# MIND TO MIND

Creative writing that explores the abstract side of our profession and our lives

*Stephen T. Harvey, M.D., Editor*

## Distant Vision

James M. Berry, M.D.

**Y**ou are tall, sculpted, quiet, elegant,  
perfect  
personally touched by God;  
with crystalline mind, playful spirit  
impossible outside a dream, with  
black-hole magnetism, yet  
distant from orbiting admirers  
near but not close,  
so I wait, wondering

how it feels to be you, inside your soul,  
behind your face, long-buried  
lies fractured trust/betrayal/loss;  
penetrating trauma healed into  
callus of quiet resignation,  
so you cry, softly.

Now recovered: wary, heavily armored  
once naive, now cynical;  
innocence scorned/burned/used/gone.  
no way back – no way out,  
so you write, soaring frail lines of hope and despair.

---

University of Texas Southwestern School of Medicine, Dallas, Texas. james.berry@utsw.edu

Accepted for publication October 27, 2020. Published online first on November 23, 2020.

Permission to reprint granted to the American Society of Anesthesiologists, Inc. by copyright author/owner. *Anesthesiology* 2021; 134:498–9. DOI: 10.1097/ALN.0000000000003622

I watch, want to help, to approach,  
to say “I see your pain, know your heart,” but  
your fortress is thick and high, impervious.  
And, you just don’t need another relationship,  
so I read, and imagine being you.
